# Supplementary material for: Pulmonary hypertension associated with lung diseases
Source: PubMed Central journal article supplement — Eur Respir J. 2024 Oct 31;64(4):2401200. doi: 10.1183/13993003.01200-2024 (PMC11525344; doi:10.1183/13993003.01200-2024), 2024-10-31
Supplement: ERJ-01200-2024.Supplement.pdf [file ERJ-01200-2024.Supplement.pdf]

### ***COPD-PH Pathogenesis***

The major pathologic determinants of increased PVR in COPD are pulmonary vascular remodeling and reduced vascular density, or vascular pruning. Pulmonary vascular remodeling, consisting mainly of thickening of the intimal layer in pulmonary arteries (PA) and arterioles, is highly prevalent in COPD, even in patients without PH and also in smokers without airflow obstruction.(1-3) In non-severe COPD-PH, hypertrophy of the muscular layer and muscularization of the arterioles has been described, while in severe COPD-PH prominent muscularization of pulmonary arterioles becomes apparent.(4-6)

Pulmonary vascular remodeling in COPD-PH includes proliferation of endothelial cells (ECs), smooth muscle cells (SMCs), and fibroblasts leading to intimal hyperplasia and medial hypertrophy of arteries or arterioles in concert with endothelial injury and reduced capillary density.(1, 7-9) Endothelial dysfunction plays a central role in the pathogenesis of PH in COPD.(7, 8) It is associated with changes in the availability/release of vasoactive mediators with an imbalance favoring vasoconstriction, cell proliferation and vascular remodeling.(1, 2, 7, 8, 10) Reduced endothelium-dependent relaxation of PA has been shown across a spectrum of COPD severity and correlates with the severity of vessel remodeling.(1, 2)

Proliferation of SMCs includes differentiation from resident precursor cells, de-differentiation of mature SMCs from the media that migrate to the intima, trans-differentiation of EC to SMCs, or recruitment from circulating bone marrow-derived progenitor cells.(7, 8, 11) In addition, hypoxic vasoconstriction, cigarette smoke, and inflammatory mechanisms are thought to contribute to COPD-PH.(2, 7, 8, 12) These mechanisms are interdependent, modulated by genetic factors, and may be influenced by comorbidities such as sleep-disordered breathing, left ventricle (LV) failure and chronic pulmonary thromboembolism.

Vascular pruning found histologically in the lungs of COPD patients with severe PH can also be assessed by computed tomography (CT) measurements of small vessel density itself inversely related to PA pressure in COPD.(5, 13, 14) The severity of emphysema is unrelated to pulmonary vascular remodeling and the association between small vessel density and PH severity is only apparent in patients with mild emphysema, suggesting that pulmonary vascular pruning is not due to emphysema.(3, 15, 16)

Cigarette smoking (CS) is considered a triggering event, and its effects are synergistic with those of hypoxia and inflammation in activating common signaling pathways.(2, 7, 8) The nitric oxide (NO)-soluble guanylate cyclase (sGC)-cyclic guanosine monophosphate pathway is of particular interest as COPD-PH vasculature demonstrates reduced endothelial NO synthase (eNOS) and sGC.(2, 7) In rodent models, exposure to CS, sGC stimulators or phosphodiesterase-5 (PDE-5) inhibitors attenuate PH, pulmonary vessels and right ventricle (RV) remodeling and, interestingly, the development of emphysema.(17-19)

Prostacyclin and redox pathways may also be involved in the pathogenesis of COPD-PH. Beraprost, a prostacyclin analogue, the thromboxane-A synthase receptor antagonist daltroban, and the selective cyclooxygenase-2 inhibitor celecoxib significantly inhibited CS-induced proliferation of human PA SMCs and EC.(20) Inhibition of calpain, a regulator of reactive oxygen species production, has been shown to attenuate the proliferation of PA SMCs induced by CS extract in vitro, as well as the development of PH and pulmonary vascular remodeling in rats exposed to CS.(21)

In hypoxia-induced PH rodent models, inhibition of several miRs and epigenetic modulators has been shown to attenuate pulmonary vascular and RV remodeling. In addition, there was suppression of in vitro SMC proliferation and migration through the modulation of different downstream pathways (cyclin-dependent kinase inhibitor 1A, bone morphogenetic protein receptor type 2 (BMP2) and nitric oxide synthase 1 (NOS)).(22)

### ***ILD-PH Pathogenesis***

#### ***Pathogenesis***

The current understanding of PH pathogenesis in ILD incorporates multiple contributory mechanisms, rather than the previously held prominence accounted to the role of hypoxia. The postulated mechanisms of ILD-PH include hypoxic vasoconstriction, disrupted angiogenesis resulting in decreased vascularity in fibrotic areas and increased microvascular density in nonfibrotic areas, neoangiogenesis, reduced capacitance and elastance of the vascular bed due to parenchymal destruction, as well as compression of peripheral lung vessels by collagen-rich fibrosis. In addition, shared pathways are dysregulated between fibrogenesis and PH causing remodeling of vasculature with intimal fibrosis and medial hypertrophy with hyperplasia of SMCs and fibroblasts, as well as endothelial-to-mesenchymal cell transition.(8, 23-25) Variable forms of neoangiogenesis exist in different ILDs (i.e. aberrant sprouting angiogenesis in UIP and misguided intussusceptive angiogenesis in NSIP).(26) Cigarette smoke (CS) appears to play an independent role in the development of a pulmonary vasculopathy through complex mechanisms including the decreased expression of endothelial NOS.(27) In addition, there is emerging data on the role of air pollution on endothelial function in ILD.(28) In IPF specifically, pulmonary veins show constrictive remodeling in both preserved and fibrotic areas, even in the absence of arterial remodeling.(29)

On the molecular level, disruption in endothelial NOS, transforming growth factor (TGF)- $\beta$ 1, hypoxia inducible factor-1 alpha, vascular endothelial growth factor (VEGF)-A, tumor necrosis factor (TNF)- $\alpha$ , platelet derived growth factor (PDGF), fibroblast growth factor (FGF), profibrogenic leukotrienes, miRs, and transcription factor Slug/prolactin-induced protein are all thought to play a role.(8, 23, 27)

Little is known about the genetic variability that may contribute to the pathogenesis of ILD-PH. Patients with IPF-PH have a specific gene signature including expression of mediators of PA SMC and EC proliferation, Wnt signaling, complement system activation, and extracellular matrix (ECM) remodeling and apoptosis.(8, 23, 30) Several studies have linked the reduced expression of bone morphogenetic protein receptor (BMP2) 2 (and imbalance in P-SMAD 1/5/8 versus P-SMAD 2/3) to the development of vasculopathy in ILD.(31, 32) A recent neuronal network analysis suggested that there is shared genetic and protein dysregulation in EC proliferation and migration in patients with IPF, PAH and pulmonary veno-occlusive disease (PVOD) with similarities in anti-inflammatory, anti-angiogenic and anti-apoptotic pathway dysregulation in IPF and PVOD cohorts.(33)

## REFERENCES

1. Blanco I, Tura-Ceide O, Peinado VI, Barbera JA. Updated Perspectives on Pulmonary Hypertension in COPD. *Int J Chron Obstruct Pulmon Dis*. 2020;15:1315-24.
2. Gredic M, Blanco I, Kovacs G, Helyes Z, Ferdinandy P, Olschewski H, et al. Pulmonary hypertension in chronic obstructive pulmonary disease. *Br J Pharmacol*. 2021;178(1):132-51.
3. Zeder K, Marsh LM, Avian A, Brcic L, Birnhuber A, Douschan P, et al. Compartment-specific remodeling patterns in end-stage chronic obstructive pulmonary disease with and without severe pulmonary hypertension. *J Heart Lung Transplant*. 2024.
4. Peinado VI, Gomez FP, Barbera JA, Roman A, Angels Montero M, Ramirez J, et al. Pulmonary vascular abnormalities in chronic obstructive pulmonary disease undergoing lung transplant. *J Heart Lung Transplant*. 2013;32(12):1262-9.
5. Bunel V, Guyard A, Dauriat G, Danel C, Montani D, Gauvain C, et al. Pulmonary Arterial Histologic Lesions in Patients With COPD With Severe Pulmonary Hypertension. *Chest*. 2019;156(1):33-44.
6. Carlsen J, Hasseriis Andersen K, Boesgaard S, Iversen M, Steinbruchel D, Bogelund Andersen C. Pulmonary arterial lesions in explanted lungs after transplantation correlate with severity of pulmonary hypertension in chronic obstructive pulmonary disease. *J Heart Lung Transplant*. 2013;32(3):347-54.
7. Karnati S, Seimetz M, Kleefeldt F, Sonawane A, Madhusudhan T, Bachhuka A, et al. Chronic Obstructive Pulmonary Disease and the Cardiovascular System: Vascular Repair and Regeneration as a Therapeutic Target. *Front Cardiovasc Med*. 2021;8:649512.
8. Singh N, Dorfmueller P, Shlobin OA, Ventetuolo CE. Group 3 Pulmonary Hypertension: From Bench to Bedside. *Circ Res*. 2022;130(9):1404-22.
9. Stenmark KR, Frid MG, Graham BB, Tudor RM. Dynamic and diverse changes in the functional properties of vascular smooth muscle cells in pulmonary hypertension. *Cardiovasc Res*. 2018;114(4):551-64.
10. Polverino F, Celli BR, Owen CA. COPD as an endothelial disorder: endothelial injury linking lesions in the lungs and other organs? (2017 Grover Conference Series). *Pulm Circ*. 2018;8(1):2045894018758528.
11. Tura-Ceide O, Pizarro S, Garcia-Lucio J, Ramirez J, Molins L, Blanco I, et al. Progenitor cell mobilisation and recruitment in pulmonary arteries in chronic obstructive pulmonary disease. *Respir Res*. 2019;20(1):74.
12. Bhattarai P, Lu W, Gaikwad AV, Dey S, Chia C, Larby J, et al. Arterial remodelling in smokers and in patients with small airway disease and COPD: implications for lung physiology and early origins of pulmonary hypertension. *ERJ Open Res*. 2022;8(4).
13. Rahaghi FN, Argemi G, Nardelli P, Dominguez-Fandos D, Arguis P, Peinado VI, et al. Pulmonary vascular density: comparison of findings on computed tomography imaging with histology. *Eur Respir J*. 2019;54(2).
14. Matsuoka S, Washko GR, Yamashiro T, Estepar RS, Diaz A, Silverman EK, et al. Pulmonary hypertension and computed tomography measurement of small pulmonary vessels in severe emphysema. *Am J Respir Crit Care Med*. 2010;181(3):218-25.
15. Washko GR, Nardelli P, Ash SY, Vegas Sanchez-Ferrero G, Rahaghi FN, Come CE, et al. Arterial Vascular Pruning, Right Ventricular Size, and Clinical Outcomes in Chronic Obstructive Pulmonary Disease. A Longitudinal Observational Study. *Am J Respir Crit Care Med*. 2019;200(4):454-61.
16. Alkhanfar D, Shahin Y, Alandejani F, Dwivedi K, Alabed S, Johns C, et al. Severe pulmonary hypertension associated with lung disease is characterised by a loss of small pulmonary vessels on quantitative computed tomography. *ERJ Open Res*. 2022;8(2).

17. Pichl A, Sommer N, Bednorz M, Seimetz M, Hadzic S, Kuhnert S, et al. Riociguat for treatment of pulmonary hypertension in COPD: a translational study. *Eur Respir J.* 2019;53(6).
18. Paul T, Blanco I, Aguilar D, Tura-Ceide O, Bonjoch C, Smolders VF, et al. Therapeutic effects of soluble guanylate cyclase stimulation on pulmonary hemodynamics and emphysema development in guinea pigs chronically exposed to cigarette smoke. *Am J Physiol Lung Cell Mol Physiol.* 2019;317(2):L222-L34.
19. Dominguez-Fandos D, Valdes C, Ferrer E, Puig-Pey R, Blanco I, Tura-Ceide O, et al. Sildenafil in a cigarette smoke-induced model of COPD in the guinea-pig. *Eur Respir J.* 2015;46(2):346-54.
20. Alqarni AA, Brand OJ, Pasini A, Alahmari M, Alghamdi A, Pang L. Imbalanced prostanoid release mediates cigarette smoke-induced human pulmonary artery cell proliferation. *Respir Res.* 2022;23(1):136.
21. Zhu J, Kovacs L, Han W, Liu G, Huo Y, Lucas R, et al. Reactive Oxygen Species-Dependent Calpain Activation Contributes to Airway and Pulmonary Vascular Remodeling in Chronic Obstructive Pulmonary Disease. *Antioxid Redox Signal.* 2019;31(12):804-18.
22. Yang Z, Li P, Yuan Q, Wang X, Ma HH, Zhuan B. Inhibition of miR-4640-5p alleviates pulmonary hypertension in chronic obstructive pulmonary disease patients by regulating nitric oxide synthase 1. *Respir Res.* 2023;24(1):92.
23. Piccari L, Allwood B, Antoniou K, Chung JH, Hassoun PM, Nikkho SM, et al. Pathogenesis, clinical features, and phenotypes of pulmonary hypertension associated with interstitial lung disease: A consensus statement from the Pulmonary Vascular Research Institute's Innovative Drug Development Initiative - Group 3 Pulmonary Hypertension. *Pulm Circ.* 2023;13(2):e12213.
24. Gaikwad AV, Lu W, Dey S, Bhattarai P, Haug G, Larby J, et al. Endothelial-to-mesenchymal transition: a precursor to pulmonary arterial remodelling in patients with idiopathic pulmonary fibrosis. *ERJ Open Res.* 2023;9(2).
25. Dotan Y, Stewart J, Gangemi A, Wang H, Aneja A, Chakraborty B, et al. Pulmonary vasculopathy in explanted lungs from patients with interstitial lung disease undergoing lung transplantation. *BMJ Open Respir Res.* 2020;7(1).
26. Ackermann M, Stark H, Neubert L, Schubert S, Borchert P, Linz F, et al. Morphomolecular motifs of pulmonary neoangiogenesis in interstitial lung diseases. *Eur Respir J.* 2020;55(3).
27. Seimetz M, Parajuli N, Pichl A, Veit F, Kwapiszewska G, Weisel FC, et al. Inducible NOS inhibition reverses tobacco-smoke-induced emphysema and pulmonary hypertension in mice. *Cell.* 2011;147(2):293-305.
28. Johannson KA, Vittinghoff E, Lee K, Balmes JR, Ji W, Kaplan GG, et al. Acute exacerbation of idiopathic pulmonary fibrosis associated with air pollution exposure. *Eur Respir J.* 2014;43(4):1124-31.
29. Colombat M, Mal H, Groussard O, Capron F, Thabut G, Jebrak G, et al. Pulmonary vascular lesions in end-stage idiopathic pulmonary fibrosis: Histopathologic study on lung explant specimens and correlations with pulmonary hemodynamics. *Hum Pathol.* 2007;38(1):60-5.
30. Hoffmann J, Wilhelm J, Olschewski A, Kwapiszewska G. Microarray analysis in pulmonary hypertension. *Eur Respir J.* 2016;48(1):229-41.
31. Chen NY, S DC, Luo F, Weng T, Le TT, A MH, et al. Macrophage bone morphogenic protein receptor 2 depletion in idiopathic pulmonary fibrosis and Group III pulmonary hypertension. *Am J Physiol Lung Cell Mol Physiol.* 2016;311(2):L238-54.
32. Jiang Q, Liu C, Liu S, Lu W, Li Y, Luo X, et al. Dysregulation of BMP9/BMP2/SMAD signalling pathway contributes to pulmonary fibrosis and pulmonary hypertension induced by bleomycin in rats. *Br J Pharmacol.* 2021;178(1):203-16.

33. Neubert L, Borchert P, Stark H, Hofer A, Vogel-Claussen J, Warnecke G, et al. Molecular Profiling of Vascular Remodeling in Chronic Pulmonary Disease. *Am J Pathol.* 2020;190(7):1382-96.
